# Supplementary material for: Identification by MicroRNA Analysis of Environmental Risk Factors Bearing Pathogenic Relevance in Non-Smoker Lung Cancer
Source: MDPI journal article supplement (doi:10.3390/jpm11070666), 2021-07-15
Supplement: s1 [file s1]

Table S1. ***Cancer Related miRNAs*** altered ( $FC \geq 2$ ,  $p \leq 0.05$ ) in Volcano Plot Analysis between average signal in samples with non-small cell lung cancer vs. small cell lung cancer.

| systematic_name | p-value     | Regulation | FC     |
|-----------------|-------------|------------|--------|
| hsa-miR-1238-5p | 0.011302715 | up         | 9.62   |
| hsa-miR-1296-5p | 0.007524842 | up         | 8.62   |
| hsa-miR-1306-3p | 0.021063296 | up         | 8.58   |
| hsa-miR-205-3p  | 4.19297E-06 | up         | 220.64 |
| hsa-miR-2277-3p | 0.00932873  | up         | 10.59  |
| hsa-miR-3149    | 0.000521124 | up         | 25.38  |
| hsa-miR-326     | 0.019960763 | down       | -8.85  |
| hsa-miR-4290    | 0.000451764 | up         | 16.39  |
| hsa-miR-4440    | 0.002965666 | up         | 10.05  |
| hsa-miR-4443    | 0.03872927  | up         | 2.41   |
| hsa-miR-4481    | 0.015899722 | up         | 7.33   |
| hsa-miR-4716-5p | 0.000232035 | up         | 20.00  |
| hsa-miR-4763-5p | 0.008582705 | up         | 8.26   |
| hsa-miR-4793-3p | 0.002927522 | up         | 16.70  |
| hsa-miR-483-3p  | 0.002941658 | up         | 13.22  |
| hsa-miR-504-3p  | 0.002079689 | up         | 14.95  |
| hsa-miR-595     | 0.000426941 | up         | 21.36  |
| hsa-miR-6730-3p | 0.016724579 | up         | 6.91   |
| hsa-miR-6743-3p | 0.043577574 | up         | 7.71   |
| hsa-miR-6779-3p | 0.016434822 | up         | 8.81   |
| hsa-miR-6794-3p | 0.005262722 | up         | 7.19   |
| hsa-miR-6817-5p | 0.044506542 | up         | 7.97   |
| hsa-miR-6826-5p | 0.02230857  | up         | 2.63   |
| hsa-miR-6886-3p | 0.014682693 | up         | 12.86  |
| hsa-miR-6891-3p | 0.01124693  | up         | 7.93   |
| hsa-miR-7108-3p | 0.012961295 | up         | 6.21   |

Table S2. Significant altered miRNAs (Volcano plot moderated t-test, [mutated tissues] vs. [no mutated tissues],  $FC \geq 2$ ,  $p \leq 0.05$ , no correction) between tumoral tissues of a total of 33 patients by Gene mutation, using only Cancer Associated miRNAs from Table 1S. TargetScan predicted if each miRNA targeted directly considered genes.

| Mutation | systematic_name | p-value  | Regulation | FC     | mirbase accession No | Direct Target |
|----------|-----------------|----------|------------|--------|----------------------|---------------|
| BRAF     | hsa-miR-1306-3p | 0.024846 | down       | -32.20 | MIMAT0005950         | NO            |
| BRAF     | hsa-miR-139-3p  | 0.01998  | down       | -11.09 | MIMAT0004552         | NO            |
| BRAF     | hsa-miR-193a-5p | 0.049849 | down       | -7.84  | MIMAT0004614         | NO            |
| BRAF     | hsa-miR-3620-5p | 0.009772 | down       | -16.80 | MIMAT0022967         | NO            |
| BRAF     | hsa-miR-3659    | 0.015827 | down       | -35.46 | MIMAT0018080         | NO            |
| BRAF     | hsa-miR-521     | 0.00369  | up         | 13.25  | MIMAT0002854         | NO            |
| BRAF     | hsa-miR-610     | 0.042202 | down       | -15.90 | MIMAT0003278         | NO            |
| EGFR     | hsa-miR-744-5p  | 0.048781 | down       | -6.35  | MIMAT0004945         | NO            |
| KRAS     | hsa-miR-106b-3p | 0.009659 | up         | 5.78   | MIMAT0004672         | NO            |
| KRAS     | hsa-miR-1247-5p | 0.026188 | up         | 2.56   | MIMAT0005899         | NO            |
| KRAS     | hsa-miR-1306-3p | 0.045089 | up         | 5.07   | MIMAT0005950         | NO            |
| KRAS     | hsa-miR-1537-3p | 0.035001 | up         | 4.21   | MIMAT0007399         | NO            |

|        |                  |          |      |        |              |       |
|--------|------------------|----------|------|--------|--------------|-------|
| KRAS   | hsa-miR-15b-3p   | 0.048594 | up   | 4.27   | MIMAT0004586 | YES   |
| KRAS   | hsa-miR-191-5p   | 0.041432 | up   | 3.98   | MIMAT0000440 | NO    |
| KRAS   | hsa-miR-1913     | 0.005619 | up   | 7.55   | MIMAT0007888 | NO    |
| KRAS   | hsa-miR-21-3p    | 0.016535 | up   | 3.35   | MIMAT0004494 | YES   |
| KRAS   | hsa-miR-4440     | 0.027506 | up   | 5.09   | MIMAT0018958 | NO    |
| KRAS   | hsa-miR-4793-3p  | 0.04182  | up   | 6.36   | MIMAT0019966 | NO    |
| KRAS   | hsa-miR-6516-3p  | 0.046655 | up   | 6.33   | MIMAT0030418 | NO    |
| KRAS   | hsa-miR-6804-5p  | 0.001817 | up   | 12.40  | MIMAT0027508 | NO    |
| KRAS   | hur_5            | 0.033032 | up   | 2.67   | -----        | ----- |
| NOTCH1 | hsa-miR-3065-5p  | 0.02177  | down | -28.11 | MIMAT0015066 | NO    |
| STK11  | hsa-miR-100-5p   | 0.044152 | up   | 50.39  | MIMAT0000098 | NO    |
| STK11  | hsa-miR-106b-3p  | 0.027296 | up   | 18.62  | MIMAT0004672 | NO    |
| STK11  | hsa-miR-144-5p   | 0.049938 | up   | 73.34  | MIMAT0004600 | NO    |
| STK11  | hsa-miR-15b-3p   | 0.00585  | up   | 44.38  | MIMAT0004586 | NO    |
| STK11  | hsa-miR-182-3p   | 0.018396 | up   | 29.20  | MIMAT0000260 | NO    |
| STK11  | hsa-miR-190a-5p  | 0.017345 | up   | 40.56  | MIMAT0000458 | NO    |
| STK11  | hsa-miR-191-5p   | 0.005873 | up   | 33.11  | MIMAT0000440 | NO    |
| STK11  | hsa-miR-1913     | 0.010622 | up   | 37.54  | MIMAT0007888 | NO    |
| STK11  | hsa-miR-26b-3p   | 0.010553 | up   | 43.63  | MIMAT0004500 | NO    |
| STK11  | hsa-miR-29a-5p   | 0.049188 | up   | 38.69  | MIMAT0004503 | NO    |
| STK11  | hsa-miR-29b-1-5p | 0.011177 | up   | 118.38 | MIMAT0004514 | NO    |
| STK11  | hsa-miR-339-5p   | 0.037138 | up   | 16.63  | MIMAT0000764 | NO    |
| STK11  | hsa-miR-34a-3p   | 0.047655 | up   | 50.77  | MIMAT0004557 | NO    |
| STK11  | hsa-miR-4252     | 0.014764 | up   | 55.13  | MIMAT0016886 | NO    |
| STK11  | hsa-miR-4318     | 0.001537 | up   | 54.74  | MIMAT0016869 | NO    |
| STK11  | hsa-miR-4328     | 0.035986 | up   | 22.42  | MIMAT0016926 | NO    |
| STK11  | hsa-miR-4730     | 0.03915  | down | -45.98 | MIMAT0019852 | NO    |
| STK11  | hsa-miR-4770     | 0.010971 | up   | 39.62  | MIMAT0019924 | NO    |
| STK11  | hsa-miR-489-3p   | 0.004512 | up   | 43.13  | MIMAT0002805 | NO    |
| STK11  | hsa-miR-517a-3p  | 0.019567 | up   | 22.36  | MIMAT0002852 | NO    |
| STK11  | hsa-miR-517c-3p  | 0.021522 | up   | 21.18  | MIMAT0002866 | NO    |
| STK11  | hsa-miR-522-3p   | 0.026955 | up   | 6.25   | MIMAT0002868 | NO    |
| STK11  | hsa-miR-548aa    | 0.048199 | up   | 13.60  | MIMAT0018447 | YES   |
| STK11  | hsa-miR-5701     | 0.035075 | up   | 35.87  | MIMAT0022494 | NO    |
| STK11  | hsa-miR-585-3p   | 0.024521 | up   | 4.84   | MIMAT0003250 | NO    |
| STK11  | hsa-miR-6073     | 0.026801 | up   | 36.71  | MIMAT0023698 | NO    |
| STK11  | hsa-miR-624-5p   | 0.009898 | up   | 32.12  | MIMAT0003293 | NO    |
| STK11  | hsa-miR-628-5p   | 0.032169 | up   | 27.20  | MIMAT0004809 | NO    |
| STK11  | hsa-miR-6516-3p  | 0.047177 | up   | 34.70  | MIMAT0030418 | NO    |
| STK11  | hsa-miR-6872-3p  | 0.016967 | up   | 8.28   | MIMAT0027645 | NO    |
| STK11  | hsa-miR-8077     | 8.18E-04 | up   | 115.11 | MIMAT0031004 | NO    |
| TP53   | hsa-miR-147b     | 0.023046 | up   | 3.07   | MIMAT0004928 | NO    |
| TP53   | hsa-miR-205-3p   | 0.018824 | up   | 11.09  | MIMAT0009197 | YES   |
| TP53   | hsa-miR-4290     | 0.017774 | up   | 6.99   | MIMAT0016921 | NO    |
| TP53   | hsa-miR-6891-3p  | 0.043351 | up   | 4.85   | MIMAT0027683 | NO    |

REVIGO TreeMap

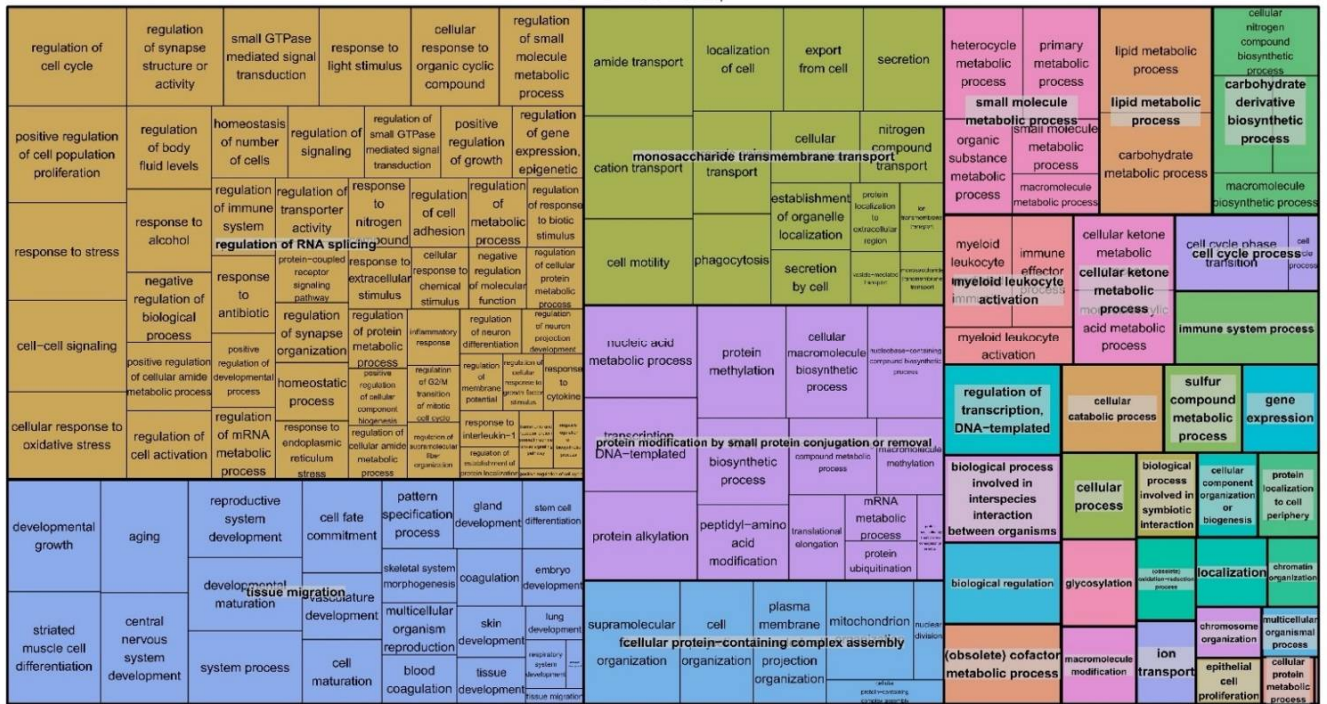

**Figure S1.** Revigo TreeMap of GO-BP analysis. Most significant BPs are classified by colour with BPs subset.
